# Supplementary material for: Effects of Cerebrolysin on Hippocampal Neuronal Death After Pilocarpine-Induced Seizure
Source: PubMed Central journal article supplement (PMC7596733; doi:10.3389/fnins.2020.568813), 2020-10-16
Supplement: Table_1.pdf [file Table_1.pdf]

## Supplementary Figure 1

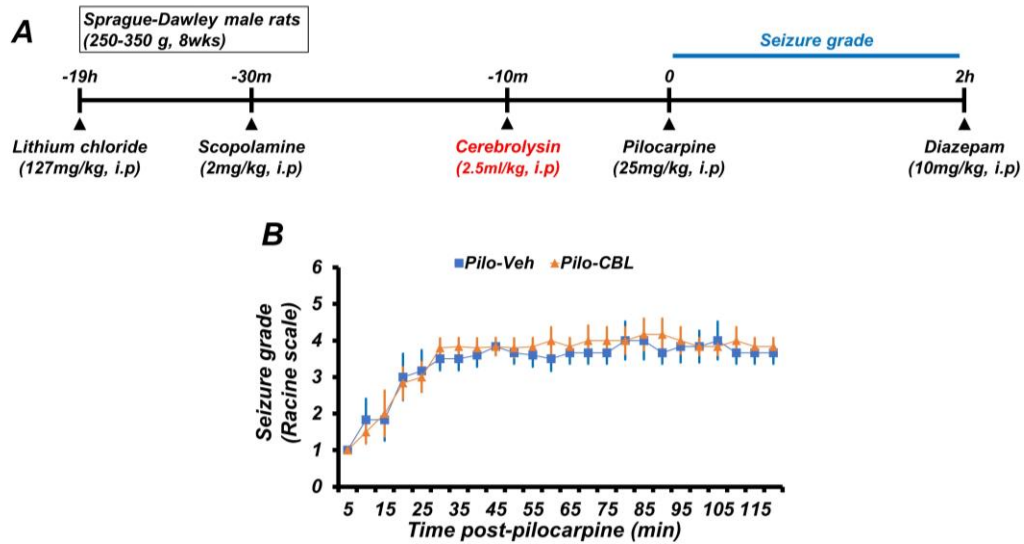

Figure S1. The experimental paradigm used in this study and the seizure grade according to the racine stage. Figure (A) indicates experimental paradigm of pre-treatment cerebrolysin. Cerebrolysin (2.5ml / kg) was administered 10 mins before pilocarpine injection following which, seizure is induced for 2 hours by pilocarpine. Figure (B) is a graph confirming the average score of the seizure grade based on the racine stage after pilocarpine administration. n=6 from each seizure group.
